# Supplementary material for: Age, vascular disease, and Alzheimer’s disease pathologies in amyloid negative elderly adults
Source: PubMed Central journal article supplement (PMC8520216; doi:10.1186/s13195-021-00913-5), 2021-10-15
Supplement: 13195_2021_913_MOESM1_ESM.pdf [file 13195_2021_913_MOESM1_ESM.pdf]

## Supplemental Material

### Cutoff of CSF $A\beta_{42}/A\beta_{40}$

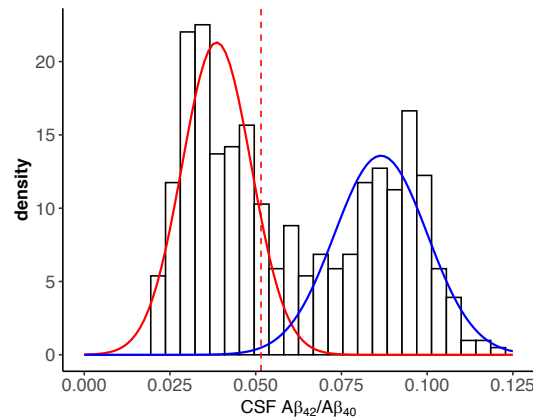

**Supplemental fig.1.** Estimates of 2 gaussian distributions of high CSF  $A\beta_{42}/A\beta_{40}$  (blue curve) and low CSF  $A\beta_{42}/A\beta_{40}$  (red curve) of among all 474 (251 CU, 184 MCI and 39 AD) ADNI participants with CSF  $A\beta_{42}/A\beta_{40}$  ratio. Red dashed vertical line reflects the  $A\beta+$  threshold of CSF  $A\beta_{42}/A\beta_{40}$  ratio 0.051, which corresponds to a 90% probability of belonging to the low CSF  $A\beta_{42}/A\beta_{40}$  distribution.

Supplemental table1. Demographics of longitudinal data

| Diagnosis                                                        | Cognitively unimpaired | Cognitively impaired |
|------------------------------------------------------------------|------------------------|----------------------|
| <b>56 participants with <math>\geq 2</math> CSF measurements</b> |                        |                      |
| Sample size                                                      | 36                     | 20                   |
| Duration of follow-up, year, (Mean (SD))                         | 5.9 (2.9)              | 3.9 (1.8)            |
| Visits of CSF, No., (Mean (SD))                                  | 2.8 (0.6)              | 2.8 (0.9)            |
| <b>61 participants with <math>\geq 2</math> aHCV</b>             |                        |                      |
| Sample size                                                      | 29                     | 32                   |
| Duration of follow-up, year, (Mean (SD))                         | 6.5(1.7)               | 3.8(2.6)             |
| Visits of aHCV, (Mean (SD))                                      | 6.4(1.5)               | 5.2(2.5)             |
| <b>39 participants with <math>\geq 2</math> FDG PET</b>          |                        |                      |
| Sample size                                                      | 22                     | 17                   |
| Duration of follow-up, year, (Mean (SD))                         | 2.4(1.4)               | 3.7(2.1)             |
| Visits of FDG PET, (Mean (SD))                                   | 2.1(0.3)               | 2.3(0.5)             |
| <b>74 participants with <math>\geq 2</math> cognition</b>        |                        |                      |
| Sample size                                                      | 29                     | 45                   |
| Duration of follow-up, year, (Mean (SD))                         | 6.8(1.3)               | 3.5(2.7)             |
| Visits of PACC scores, (Mean (SD))                               | 6.4(1.0)               | 4.6(2.8)             |

**The associations of age, vascular disease and CSF A $\beta$ <sub>40</sub>, CSF A $\beta$ <sub>42</sub>/A $\beta$ <sub>40</sub> and CSF p-Tau/A $\beta$ <sub>40</sub>**

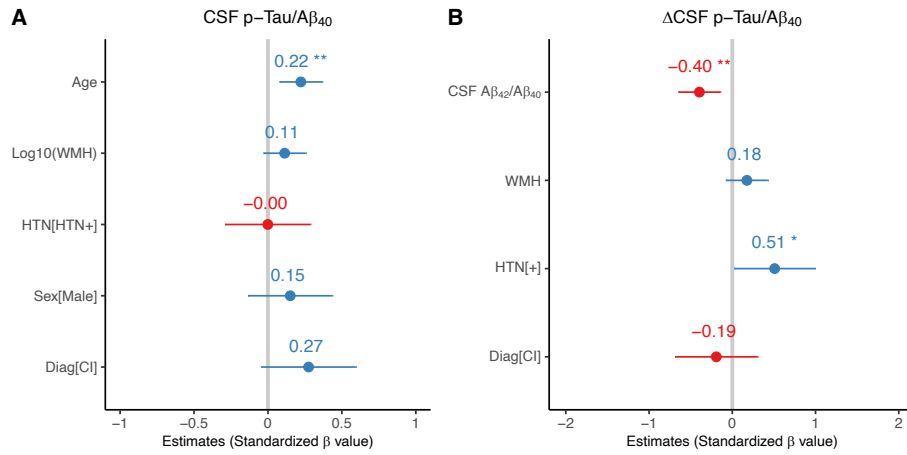

**Supplemental fig. 2.** (A). Associations of baseline CSF p-Tau/A $\beta$ <sub>40</sub> with age, white matter hyperintensities (WMH), hypertension (HTN), sex and diagnosis in one model. (B). Associations of longitudinal CSF p-Tau/A $\beta$ <sub>40</sub> changes ( $\Delta$ CSF p-Tau/A $\beta$ <sub>40</sub>) with CSF A $\beta$ <sub>42</sub>/A $\beta$ <sub>40</sub>, WMH, HTN and diagnosis in one model.

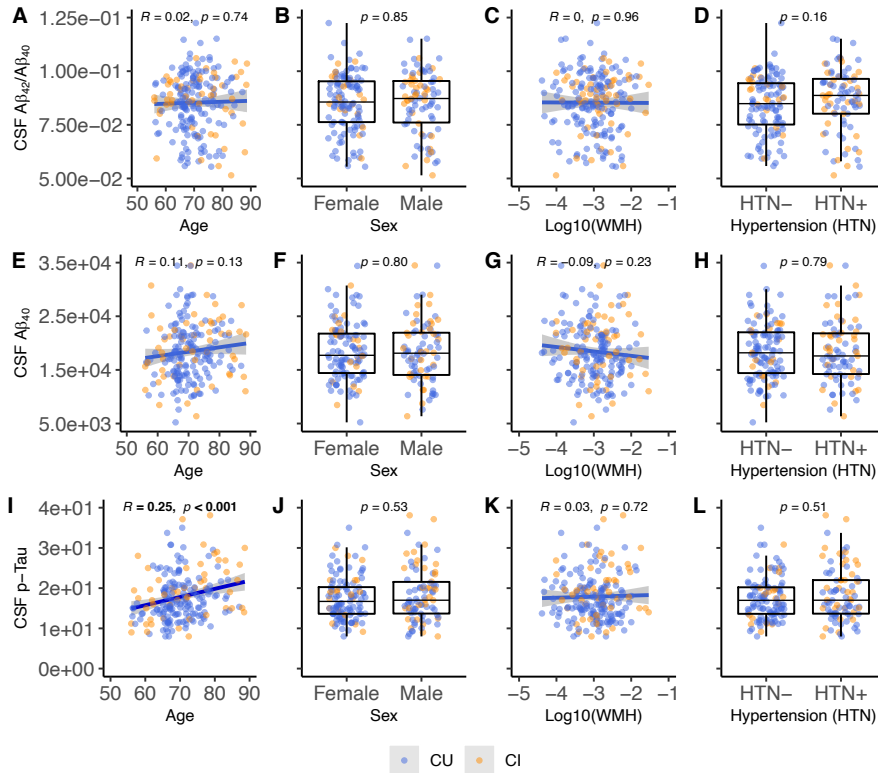

**Supplemental fig. 3.** The association of age, sex, WMH and HTN with (A-D) CSF A $\beta$ <sub>42</sub>/A $\beta$ <sub>40</sub>, (E-H) CSF A $\beta$ <sub>40</sub> and (I-L) CSF p-Tau alone in A $\beta$ - individuals.

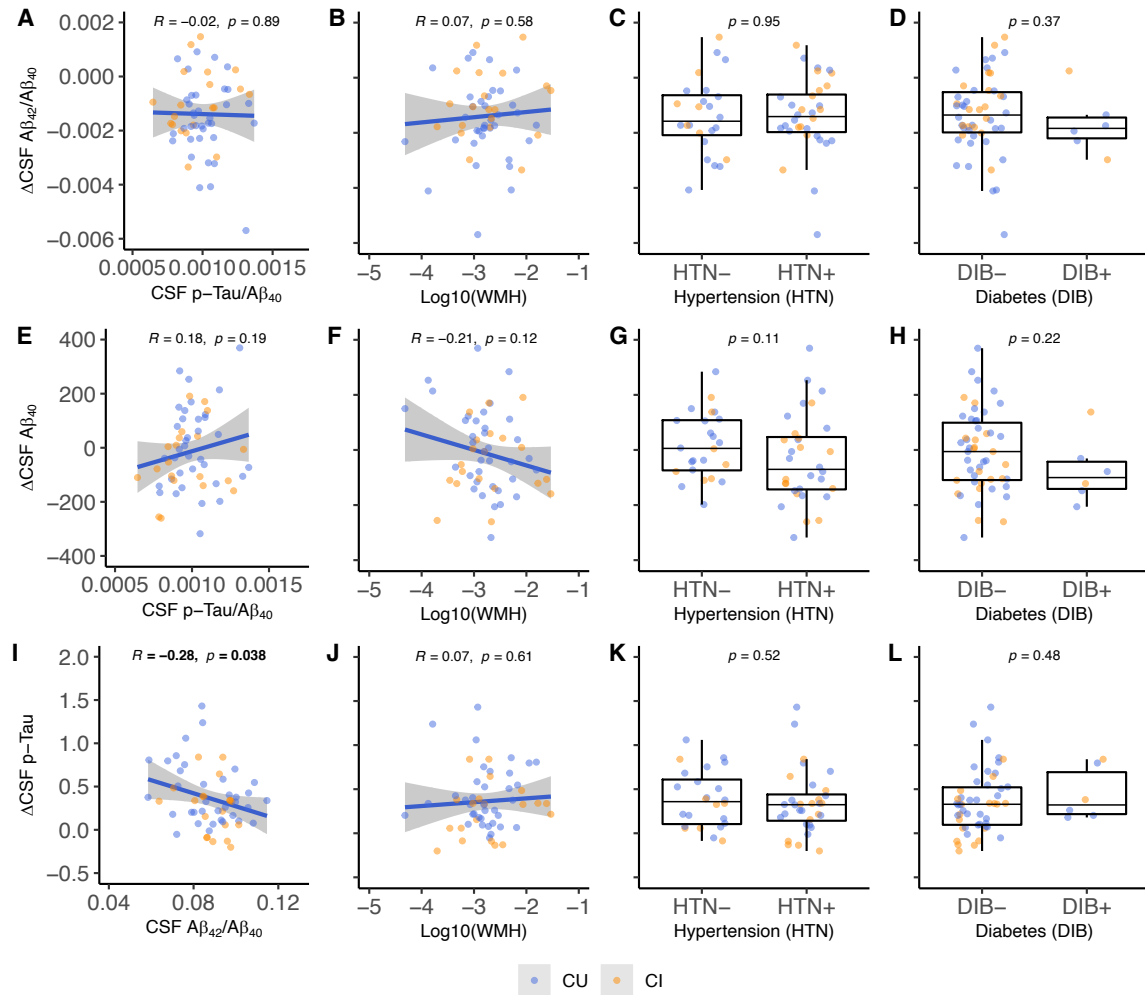

**Supplemental fig. 4.** The association of age, sex, WMH and HTN with (A-D)  $\Delta\text{CSF } A\beta_{42}/A\beta_{40}$ , (E-H)  $\Delta\text{CSF } A\beta_{40}$  and (I-L)  $\Delta\text{CSF p-Tau}$  alone in  $A\beta^-$  individuals.

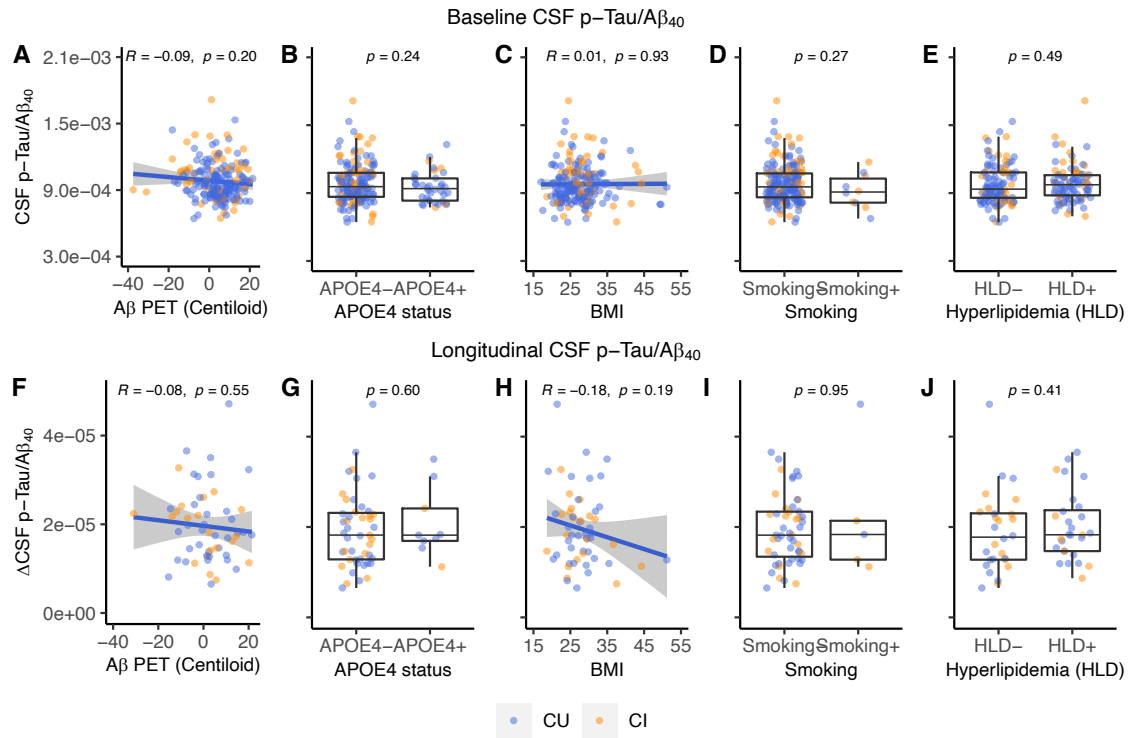

**Supplemental fig. 5. Risk factors not related to CSF p-Tau/A $\beta_{40}$  increase in A $\beta$ - individuals.**

The associations of risk factors with (A-E) baseline CSF p-Tau/A $\beta_{40}$  and (F-J) longitudinal CSF p-Tau/A $\beta_{40}$  changes ( $\Delta$ CSF p-Tau/A $\beta_{40}$ ).

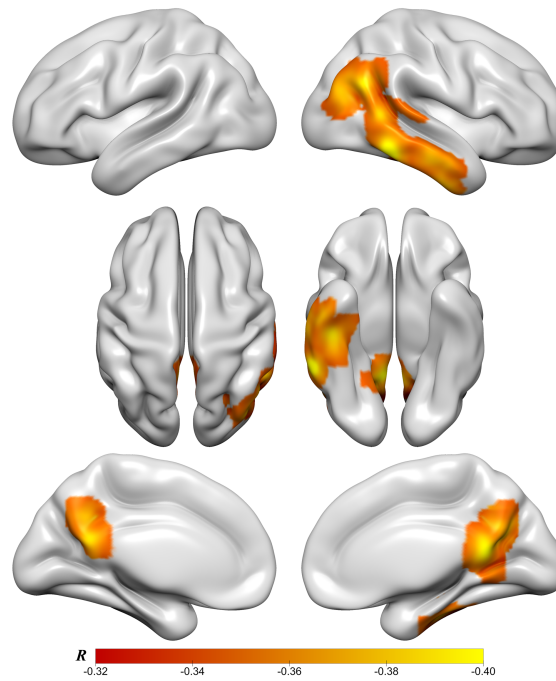

**Supplemental fig. 6.** Voxel-wise correlation between CSF  $p\text{-Tau}/A\beta_{40}$  and FDG PET with family-wise error (FWE) corrected  $p < 0.05$  at cluster level.

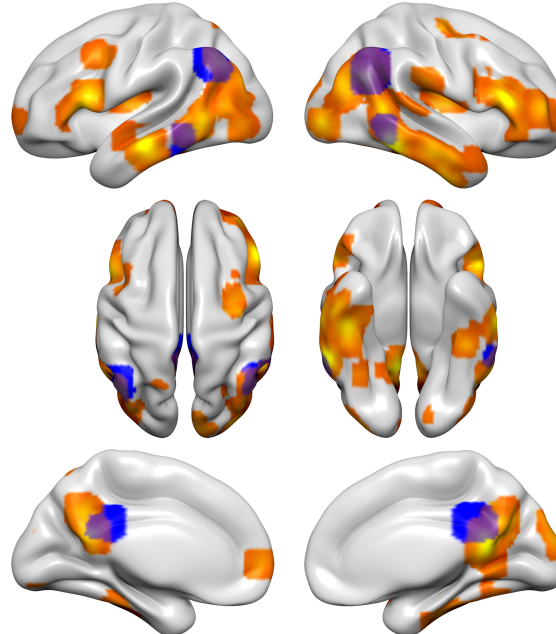

**Supplemental fig. 7.** Overlap (purple) of significant brain regions (red-yellow) between FDG SUVR and CSF  $p\text{-Tau}/A\beta_{40}$  with Alzheimer's metaROI (left angular gyrus, right angular gyrus, bilateral posterior cingulate, left inferior temporal gyrus, right inferior temporal gyrus) region (blue) of hypometabolism.

**Associations of CSF  $A\beta_{42}/A\beta_{40}$ , WMH, HTN, aHCV and  $\Delta$ PACC**

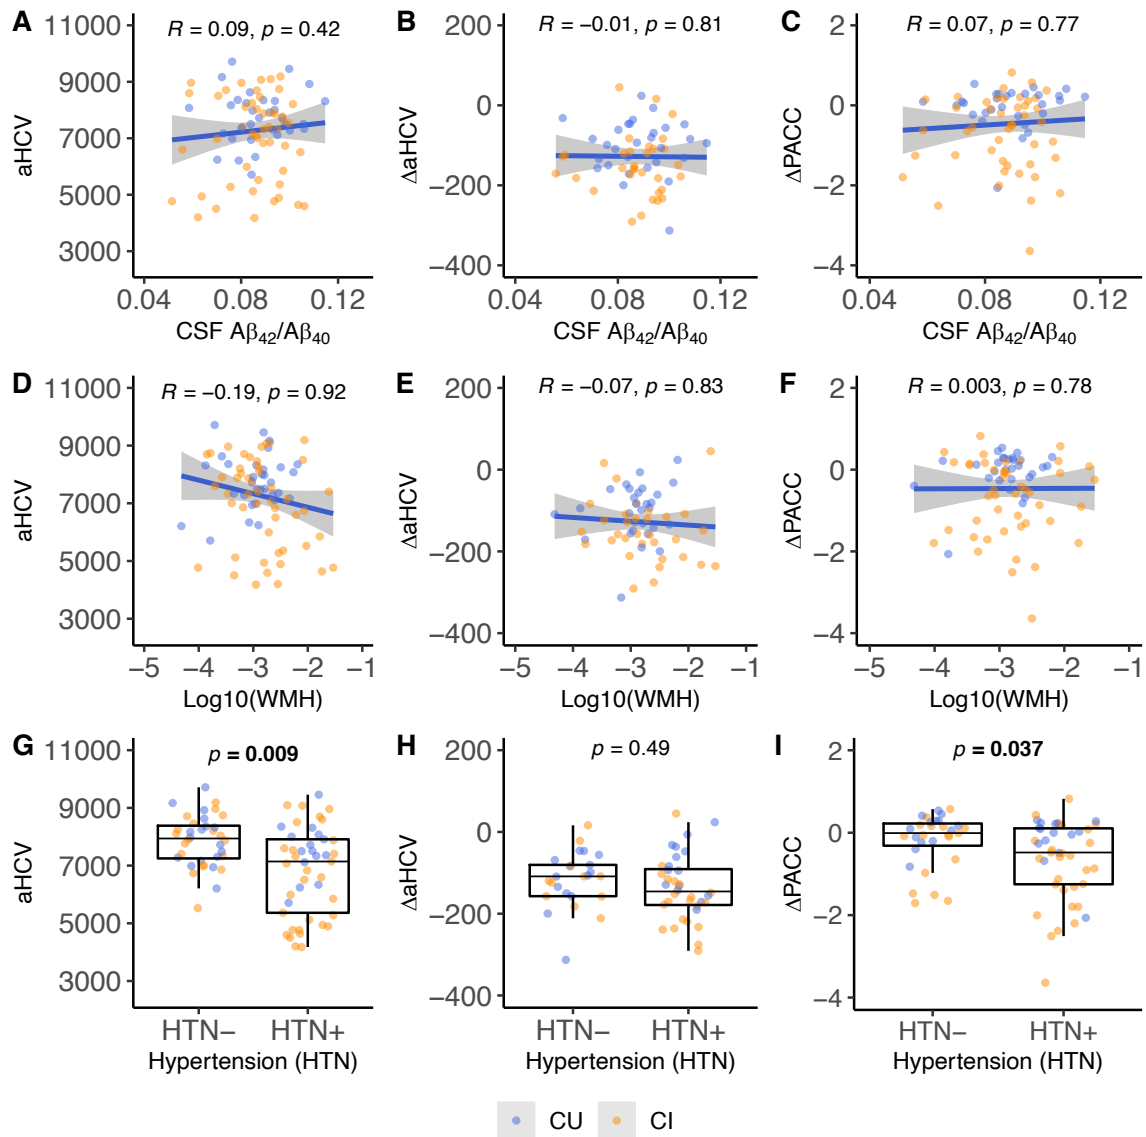

**Supplemental fig. 8.** Associations of  $A\beta_{42}/A\beta_{40}$ , White Matter Hypertension (WMH), Hypertension (HTN), adjusted hippocampal volume (aHCV) and PACC Slope ( $\Delta$ PACC).

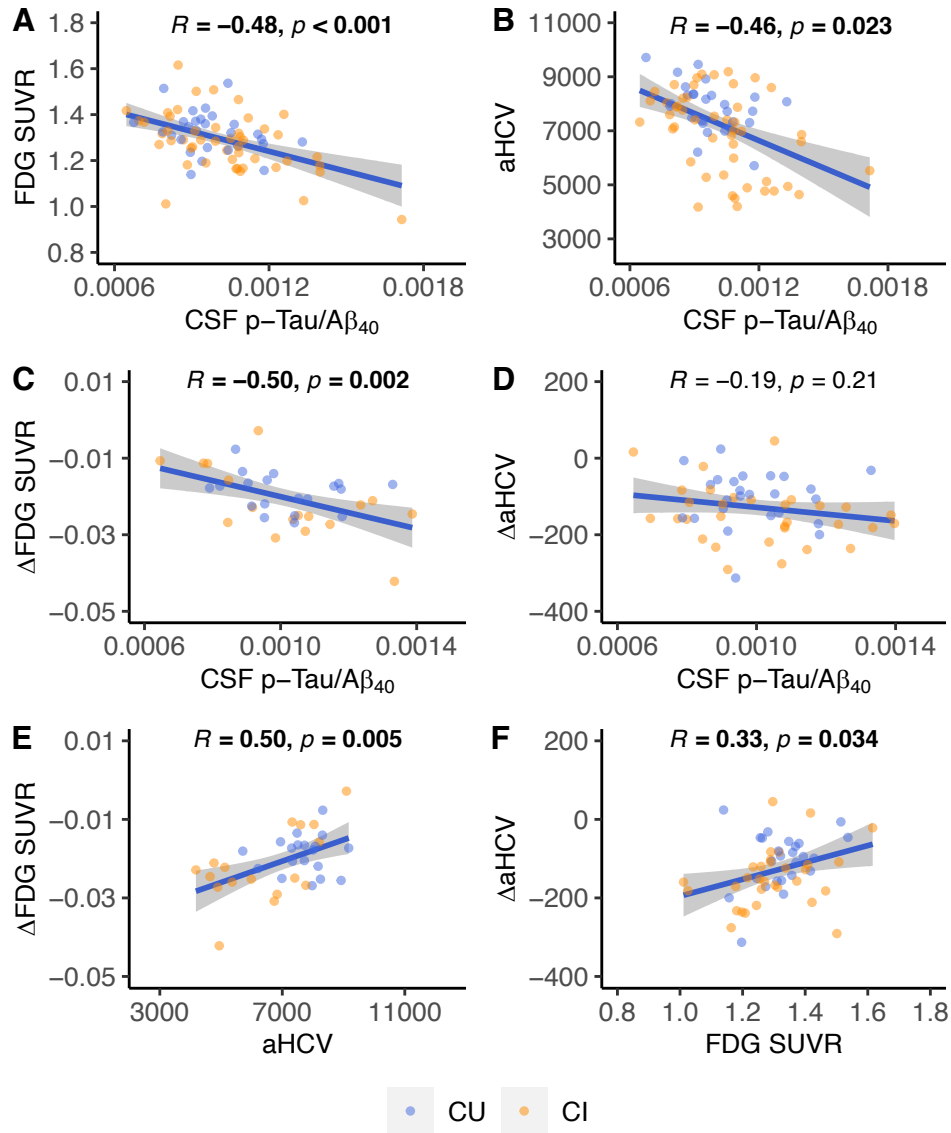

**Supplemental fig. 9. Associations of elevated tau, hypometabolism and hippocampal atrophy in  $A\beta$ - individuals after excluding  $A\beta$  status converters.** Cross-sectional associations between CSF p-Tau/ $A\beta_{40}$ , and (A) FDG SUVR (metaROIs) and (B) aHCV. Prediction of  $\Delta$ FDG SUVR by baseline (C) CSF p-Tau/ $A\beta_{40}$ , and (E) aHCV. Prediction of  $\Delta$ aHCV by baseline (D) CSF p-Tau/ $A\beta_{40}$ , and (F) FDG SUVR (metaROIs).

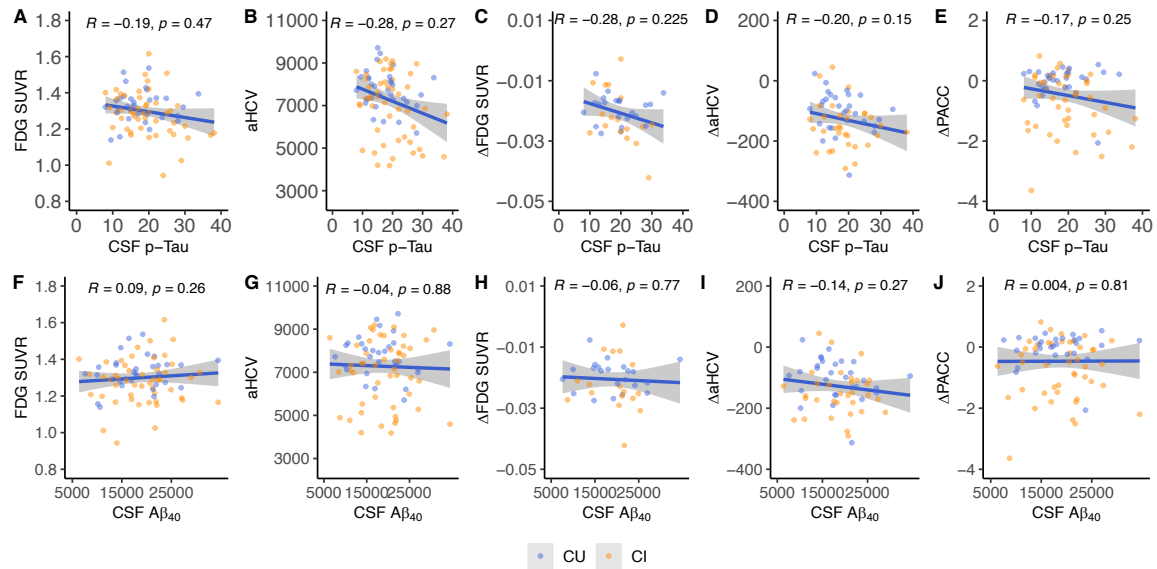

**Supplemental fig. 10. Associations of CSF p-Tau alone, CSF Aβ<sub>40</sub>, hypometabolism, hippocampal atrophy and cognitive decline in Aβ- individuals.** Cross-sectional associations between CSF p-Tau, and (A) FDG SUVR (metaROIs) and (B) aHCV. Prediction of (C) ΔFDG SUVR (metaROIs), (D) ΔaHCV and (E) ΔPACC by baseline CSF p-Tau. Cross-sectional associations between CSF Aβ<sub>40</sub>, and (F) FDG SUVR (metaROIs) and (G) aHCV. Prediction of (H) ΔFDG SUVR (metaROIs), (I) ΔaHCV and (J) ΔPACC by baseline CSF Aβ<sub>40</sub>.
